# Supplementary material for: Tuning the micromorphology and exposed facets of MnOx promotes methyl ethyl ketone low-temperature abatement: boosting oxygen activation and electron transmission
Source: Royal Society of Chemistry journal article supplement (doi:10.1039/c8cy00444g), 2018-01-01
Supplement: c8cy00444g1.pdf [file c8cy00444g1.pdf]

## Supplementary material

### **Tuning micromorphology and exposed facets of MnO<sub>x</sub> promotes methyl ethyl ketone low-temperature abatement: Boosting oxygen activation and electron transmission**

Yanfei Jian<sup>1</sup>, Changwei Chen<sup>1</sup>, Mudi Ma<sup>1</sup>, Chao Liu<sup>2</sup>, Yanke Yu<sup>1</sup>, Jie Cheng<sup>3</sup>, Chi He<sup>1,\*</sup>,  
Zhengping Hao<sup>3</sup>

*<sup>1</sup>Department of Environmental Science and Engineering, State Key Laboratory of Multiphase Flow in Power Engineering, School of Energy and Power Engineering, Xi'an Jiaotong University, Xi'an 710049, Shaanxi, P.R. China*

*<sup>2</sup>Department of Environmental Engineering and Earth Sciences, Clemson University, Anderson, South Carolina 29625, United States*

*<sup>3</sup>National Engineering Laboratory for VOCs Pollution Control Material & Technology, University of Chinese Academy of Sciences, Beijing 101408, P.R. China*

\*To whom correspondence should be addressed:

Tel./Fax: +86 29 8266 3857; E-mail: chi\_he@xjtu.edu.cn (C. He)

## Contents

**Figure S1** N<sub>2</sub> adsorption/desorption isotherms of various catalysts.

**Figure S2** TGA profiles of the fresh and used MnO<sub>x</sub>-S (A), MnO<sub>x</sub>-C (B), and MnO<sub>x</sub>-R (C) samples.

**Figure S3** Mn 2p XPS spectra of the used catalysts.

**Figure S4** XRD patterns of the used samples.

**Figure S5** Relationship between the calculated adsorption energy ( $E_{\text{ads}}$ ) and  $T_{90}$  temperature for MEK oxidation.

**Figure S6** Temperature-programmed surface reaction (TPSR) of MEK oxidation over different catalysts.

**Table S1** XPS results of the used catalysts.

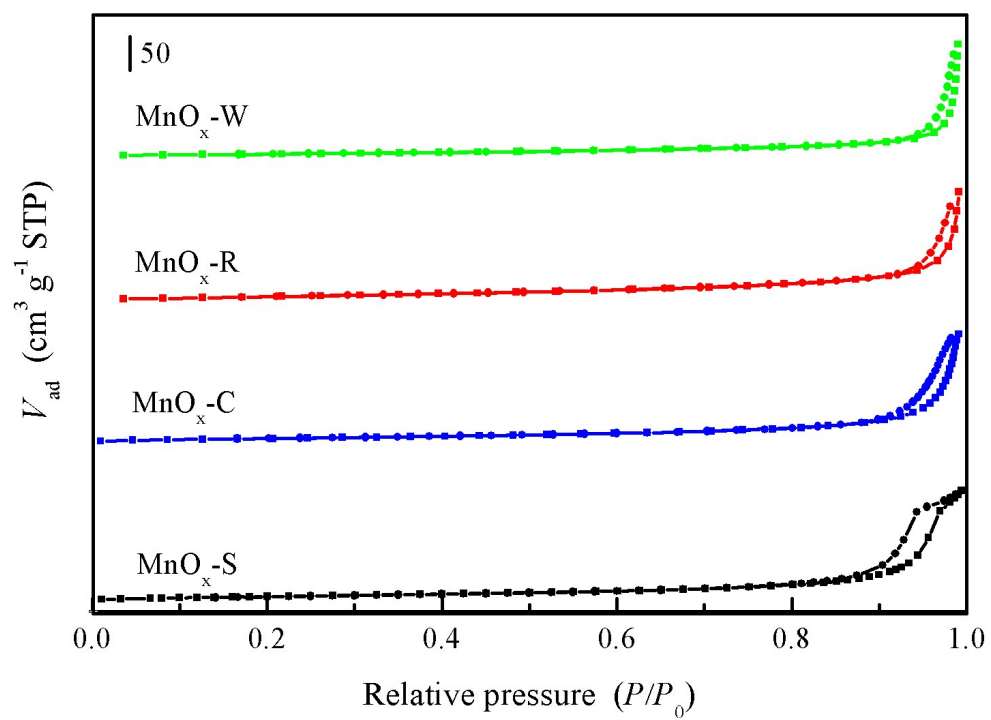

**Figure S1** N<sub>2</sub> adsorption/desorption isotherms of various catalysts.

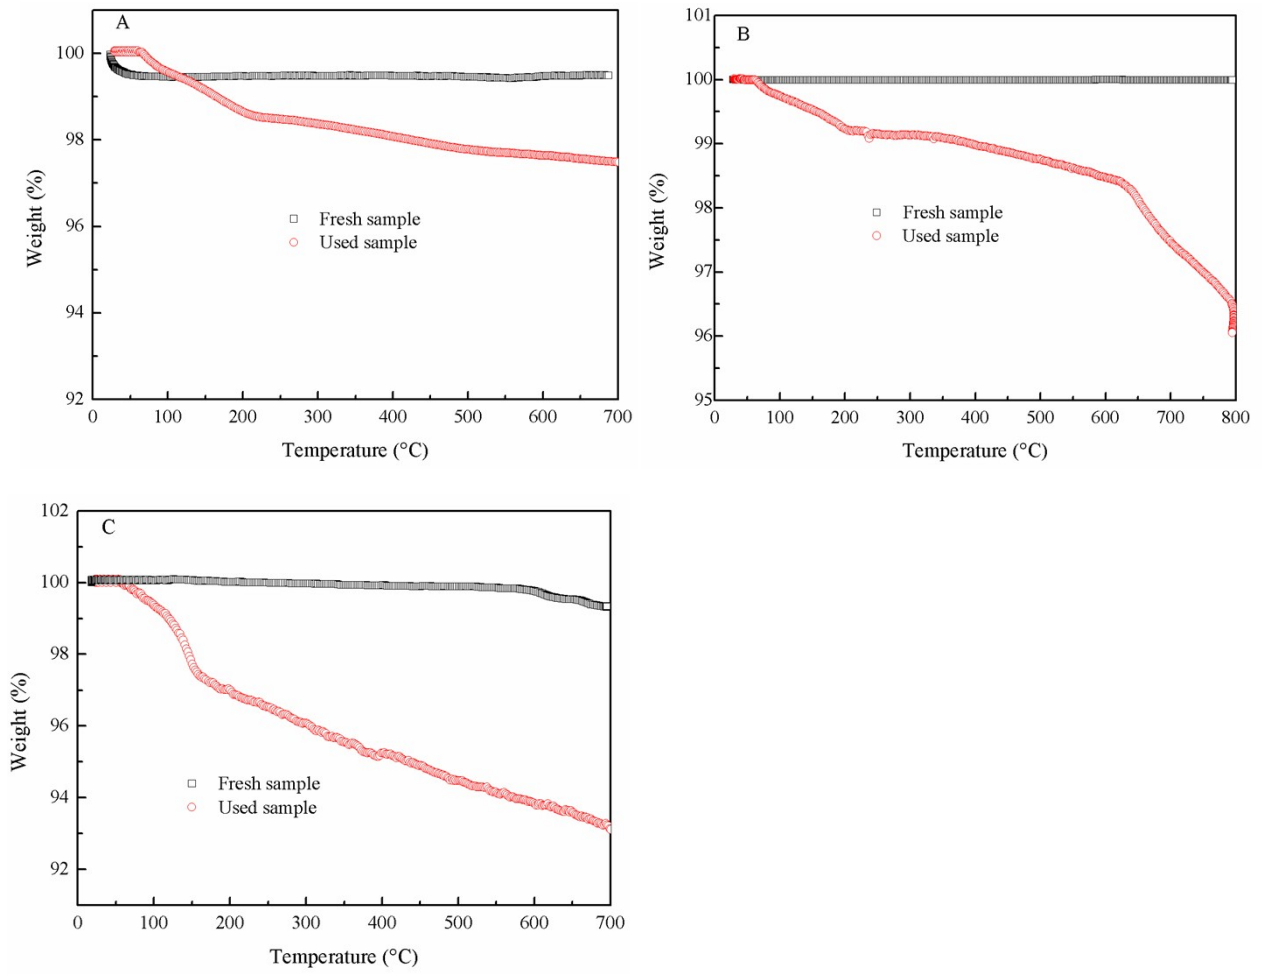

**Figure S2** TGA profiles of the fresh and used MnO<sub>x</sub>-S (A), MnO<sub>x</sub>-C (B), and MnO<sub>x</sub>-R (C) samples.

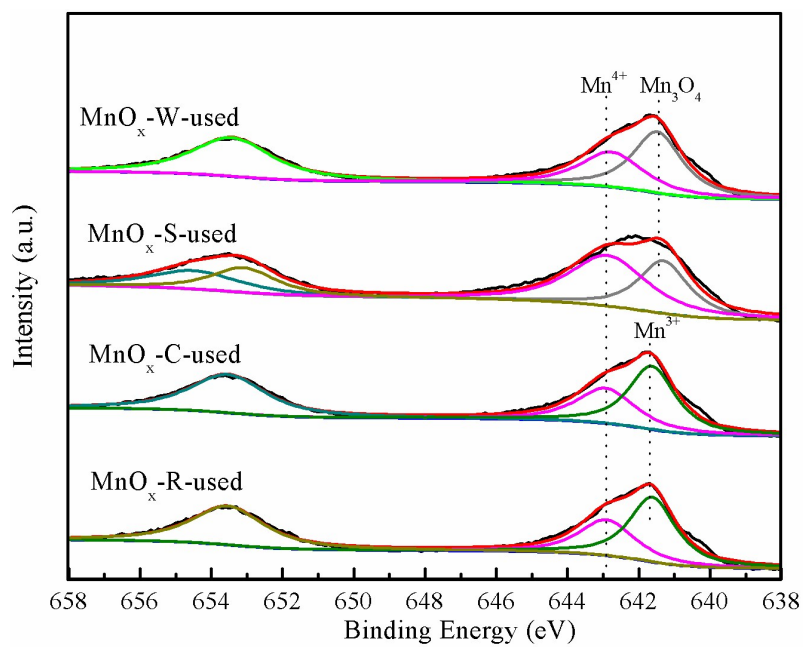

**Figure S3** Mn 2p XPS spectra of the used catalysts.

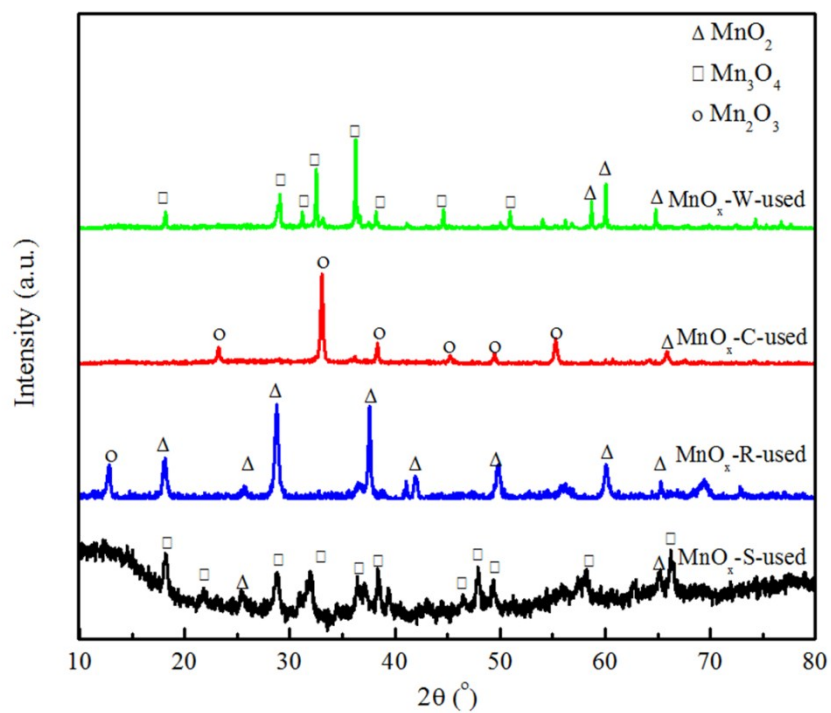

**Figure S4** XRD patterns of the used samples.

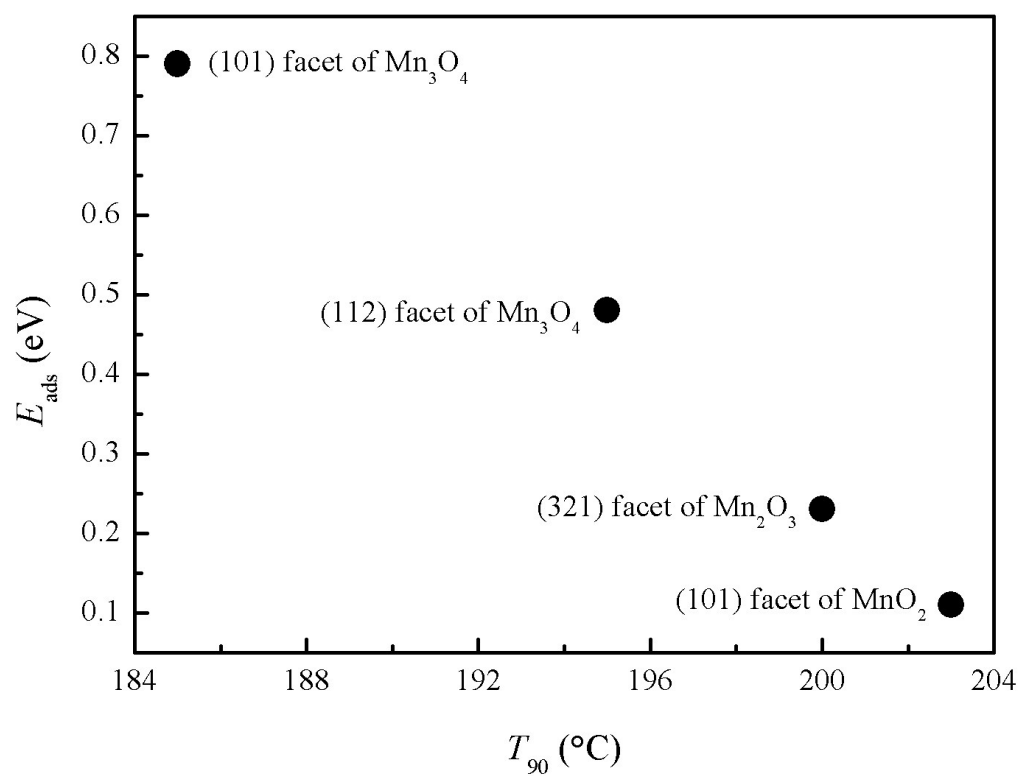

**Figure S5** Relationship between the calculated adsorption energy ( $E_{\text{ads}}$ ) and  $T_{90}$  temperature for MEK oxidation.

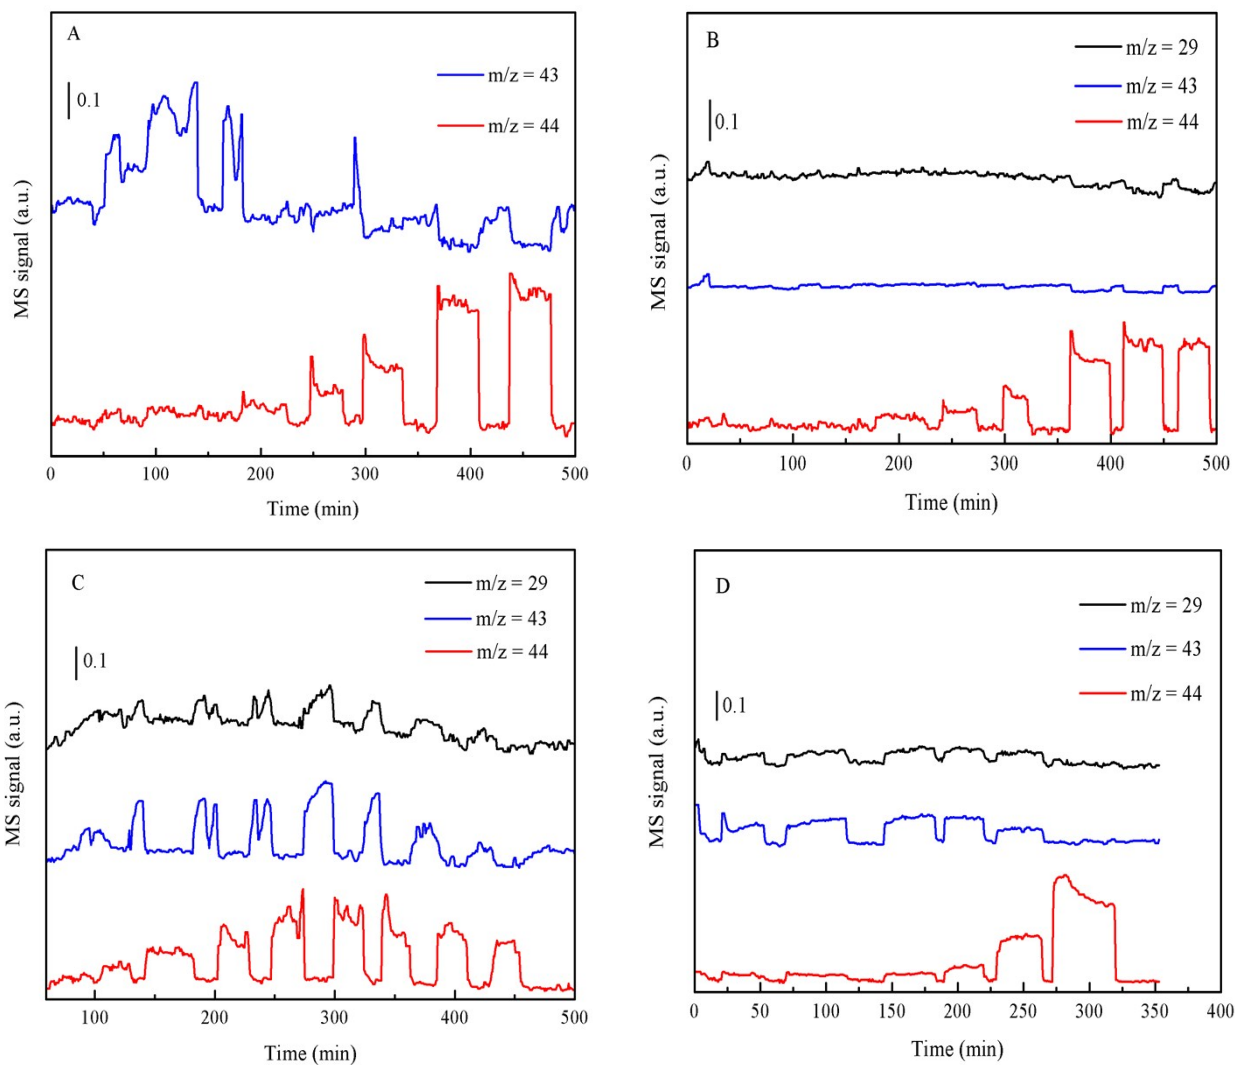

**Figure S6** Temperature-programmed surface reaction (TPSR) of MEK oxidation over different catalysts.



**Table S1** XPS results of the used catalysts.

| Sample                   | Binding Energy (eV)            |                  |                  | Molar ratio                        |                                                  |
|--------------------------|--------------------------------|------------------|------------------|------------------------------------|--------------------------------------------------|
|                          | Mn <sub>3</sub> O <sub>4</sub> | Mn <sup>3+</sup> | Mn <sup>4+</sup> | Mn <sup>4+</sup> /Mn <sup>3+</sup> | Mn <sup>4+</sup> /Mn <sub>3</sub> O <sub>4</sub> |
| MnO <sub>x</sub> -W-used | 641.4                          | /                | 642.8            | /                                  | 0.72                                             |
| MnO <sub>x</sub> -S-used | 641.4                          | /                | 642.8            | /                                  | 1.49                                             |
| MnO <sub>x</sub> -C-used | /                              | 641.6            | 642.7            | 0.68                               | /                                                |
| MnO <sub>x</sub> -R-used | /                              | 641.5            | 642.8            | 0.65                               | /                                                |
